# Supplementary material for: Structural and theoretical insights into solvent effects in an iron(iii) SCO complex
Source: Royal Society of Chemistry journal article supplement (doi:10.1039/d2qi01159j), 2022-01-01
Supplement: d2qi01159j1.pdf [file d2qi01159j1.pdf]

## Structural and theoretical insights into solvent effects in an iron (III) SCO complex

Raúl Díaz-Torres,<sup>a†</sup> Theerapoom Boonprab,<sup>a</sup> Silvia Gómez-Coca,<sup>b</sup> Eliseo Ruiz,<sup>b</sup> Guillaume Chastanet,<sup>c</sup> Phimphaka Harding<sup>a</sup> and David J. Harding<sup>\*a</sup>

<sup>a</sup> Functional Materials and Nanotechnology Centre of Excellence, Walailak University, Thasala, Nakhon Si Thammarat, 80160, Thailand.

<sup>b</sup> Departament de Química Inorgànica i Orgànica, Institut de Recerca de Química Teòrica i Computacional, Universitat de Barcelona, Diagonal 645, 08028 Barcelona, Spain.

<sup>c</sup> Université de Bordeaux, ICMCB, 87 avenue du Dr A. Schweitzer, Pessac, F-33608, France.

† Now at Thammasat University Research Unit in Multifunctional Crystalline Materials and Applications (TU-MCMA), Faculty of Science and Technology, Thammasat University, Pathum Thani 12121, Thailand

E-mail: [hdavid@mail.wu.ac.th](mailto:hdavid@mail.wu.ac.th) or [kphimpha@mail.wu.ac.th](mailto:kphimpha@mail.wu.ac.th)

| Contents                                                                                                                                                                                       | Page<br>No. |
|------------------------------------------------------------------------------------------------------------------------------------------------------------------------------------------------|-------------|
| Table S1: Selected Fe-N/O bond length (Å), volume cell (Å <sup>3</sup> ) and octahedral distortion parameters at various temperatures for all compounds.                                       | 4           |
| Table S2: Crystallographic data and structure refinement of all compounds.                                                                                                                     | 6           |
| Table S3: Intermolecular interactions of all compounds (Å).                                                                                                                                    | 8           |
| Table S4: Distances between the chains ( $d_{\text{chain}}$ ) and the planes ( $d_{\text{plane}}$ ) at different temperatures                                                                  | 11          |
| Figure S1: Experimental PXRD diffractograms (blue) and the corresponding simulated patterns (red) for <b>1-3</b> .                                                                             | 12          |
| Figure S2: Structure representation of the 2D supramolecular interactions connecting the chains of Fe(III) for <b>1</b> (above) and <b>2</b> (below) at 150 K.                                 | 13          |
| Figure S3: Structure representation of the 3D structure connecting the planes by nitrate molecules for <b>1</b> (above), <b>2</b> (middle) and <b>3</b> (below) at 150 K.                      | 15          |
| Figure S4: Structure representation of the 3D structure for <b>2ns</b> with layers end on view (top) and layers side on view (bottom) for <b>2ns</b> at 200 K.                                 | 16          |
| Figure S5: Structure representation of the 3D structure for <b>2ns</b> with plane A to plane A interactions and plane A to plane B interactions at 200 K.                                      | 17          |
| Figure S6: Structure representation of the 3D structure connecting the planes by $\pi$ - $\pi$ interactions for <b>2ns</b> at 200 K.                                                           | 18          |
| Table S5: Intermolecular interactions contributions for <b>1-2</b> calculated by Hirshfeld surface at different temperatures.                                                                  | 18          |
| Figure S7: Hirshfeld surface mapped with $d_{\text{norm}}$ (left) and 2D fingerprint of all contacts and O...H interactions for <b>1</b> , <b>2</b> and <b>2n</b> .                            | 19          |
| Figure S8: TGA curves for <b>1-3</b> , with the assigned mass losses.                                                                                                                          | 20          |
| Figure S9: Experimental PXRD diffractogram of <b>1</b> after heating at 350 K and the corresponding simulated patterns of solvated complex <b>1</b> and <b>2ns</b> (non-solvated).             | 21          |
| Figure S10: Experimental PXRD diffractogram of <b>2</b> after heating at 350 K and the corresponding simulated patterns of solvated complex <b>2</b> and <b>2ns</b> (non-solvated).            | 22          |
| Figure S11: Experimental PXRD diffractogram of <b>3</b> after heating at 350 K and 480 K, and the corresponding simulated patterns of solvated complex <b>3</b> and <b>2ns</b> (non-solvated). | 23          |
| Figure S12: Thermal variation of $\chi_{\text{MT}}$ versus T plots for <b>3</b> at different cycles.                                                                                           | 24          |

|                                                                                                                                                                                                                            |    |
|----------------------------------------------------------------------------------------------------------------------------------------------------------------------------------------------------------------------------|----|
| Figure S13: Thermal variation of $\chi_{\text{M}}T$ versus T plots for <b>1</b> at different cycles.                                                                                                                       | 24 |
| Figure S14: Thermal variation of $\chi_{\text{M}}T$ versus T plots for <b>1</b> and <b>3</b> at the 2 <sup>nd</sup> cycle.                                                                                                 | 25 |
| Figure S15: Thermal variation of $\chi_{\text{M}}T$ versus T plots for <b>2</b> at different cycles.                                                                                                                       | 25 |
| Table S6: Comparison of DFT optimized and experimental (in parenthesis) average bond lengths ( $\text{\AA}$ ) and volume cells ( $\text{\AA}^3$ ) for the low- and high- spin states for compounds <b>1</b> and <b>2</b> . | 26 |
| Figure S16: Unit cell of the optimized structures of <b>1</b> with [4HS], [3HS-1LS], [4LS] and [3LS-1HS].                                                                                                                  | 27 |
| Figure S17: Unit cell of the optimized structures of <b>2</b> with [4HS], [3HS-1LS], [4LS] and [3LS-1HS].                                                                                                                  | 28 |
| Figure S18: Unit cell of the optimized structures of <b>2ps</b> with [4HS], [3HS-1LS], [4LS] and [3LS-1HS].                                                                                                                | 29 |
| Figure S19: Unit cell of the optimized structures of <b>2ns</b> with [4HS], [3HS-1LS], [4LS] and [3LS-1HS].                                                                                                                | 30 |

**Table S1** Selected Fe-N/O bond length (Å), volume cell (Å<sup>3</sup>) and octahedral distortion parameters at various temperatures for all compounds.

|                             | <b>1</b>                                         |              | <b>2</b>                                         |              | <b>3</b>                                           |              |
|-----------------------------|--------------------------------------------------|--------------|--------------------------------------------------|--------------|----------------------------------------------------|--------------|
|                             | [Fe(qsal-Cl) <sub>2</sub> ]NO <sub>3</sub> ·MeOH |              | [Fe(qsal-Cl) <sub>2</sub> ]NO <sub>3</sub> ·EtOH |              | [Fe(qsal-Cl) <sub>2</sub> ]NO <sub>3</sub> ·1-PrOH |              |
|                             | <b>150 K</b>                                     | <b>280 K</b> | <b>150 K</b>                                     | <b>280 K</b> | <b>150 K</b>                                       | <b>280 K</b> |
| <b>Fe1-O1ph</b>             | 1.880(2)                                         | 1.871(2)     | 1.885(5)                                         | 1.905(3)     | 1.858(2)                                           | 1.860(2)     |
| <b>Fe1-O2ph</b>             | 1.868(2)                                         | 1.863(2)     | 1.885(5)                                         | 1.903(3)     | 1.883(2)                                           | 1.879(2)     |
| <b>Fe1-Oph<sub>av</sub></b> | 1.874                                            | 1.867        | 1.885                                            | 1.904        | 1.870                                              | 1.869        |
| <b>Fe1-N1quin</b>           | 1.969(2)                                         | 1.968        | 1.996(5)                                         | 2.126(3)     | 1.982(2)                                           | 1.983(2)     |
| <b>Fe1-N2im</b>             | 1.936(2)                                         | 1.933        | 1.965(5)                                         | 2.108(3)     | 1.956(3)                                           | 1.945(3)     |
| <b>Fe1-N3quin</b>           | 1.968(2)                                         | 1.970        | 1.980(5)                                         | 2.143(3)     | 1.975(3)                                           | 1.995(2)     |
| <b>Fe1-N4im</b>             | 1.940(2)                                         | 1.925        | 1.960(5)                                         | 2.104(3)     | 1.941(3)                                           | 1.962(3)     |
| <b>Fe1-N<sub>av</sub></b>   | 1.953                                            | 1.949        | 1.975                                            | 2.120        | 1.963                                              | 1.971        |
| <b>Fe2-O3ph</b>             | 1.884(2)                                         | 1.894        | -                                                | -            | -                                                  | -            |
| <b>Fe2-O4ph</b>             | 1.869(2)                                         | 1.882        | -                                                | -            | -                                                  | -            |
| <b>Fe2-Oph<sub>av</sub></b> | 1.876                                            | 1.888        | -                                                | -            | -                                                  | -            |
| <b>Fe2-N5quin</b>           | 1.994(10)                                        | 2.076        | -                                                | -            | -                                                  | -            |
| <b>Fe2-N6im</b>             | 1.944(3)                                         | 2.041        | -                                                | -            | -                                                  | -            |
| <b>Fe2-N7quin</b>           | 1.983(9)                                         | 2.069        | -                                                | -            | -                                                  | -            |
| <b>Fe2-N8im</b>             | 1.937(3)                                         | 2.040        | -                                                | -            | -                                                  | -            |
| <b>Fe2-N<sub>av</sub></b>   | 1.964                                            | 2.056        | -                                                | -            | -                                                  | -            |
| <b>V / Å<sup>3</sup></b>    | 2984                                             | 3065         | 3034                                             | 3125         | 6296                                               | 6428         |
| <b>Σ-Fe1, Fe2</b>           | 46, 51                                           | 46, 52       | 50                                               | 69           | 51                                                 | 51           |
| <b>⊖-Fe1, Fe2</b>           | 114, 155                                         | 117, 181     | 135                                              | 225          | 134                                                | 135          |

|                             | <b>2ns</b>                                     |              |              |
|-----------------------------|------------------------------------------------|--------------|--------------|
|                             | <b>[Fe(qsal-Cl)<sub>2</sub>]NO<sub>3</sub></b> |              |              |
|                             | <b>360 K</b>                                   | <b>320 K</b> | <b>200 K</b> |
| <b>Fe1-O1ph</b>             | 1.905(2)                                       | 1.888(2)     | 1.882(2)     |
| <b>Fe1-O2ph</b>             | 1.891(2)                                       | 1.871(2)     | 1.870(1)     |
| <b>Fe1-Oph<sub>av</sub></b> | 1.898                                          | 1.879        | 1.876        |
| <b>Fe1-N1quin</b>           | 2.116(2)                                       | 2.024(2)     | 1.970(2)     |
| <b>Fe1-N2im</b>             | 2.083(3)                                       | 1.993(2)     | 1.948(2)     |
| <b>Fe1-N3quin</b>           | 2.117(2)                                       | 2.026(2)     | 1.981(2)     |
| <b>Fe1-N4im</b>             | 2.081(3)                                       | 1.991(2)     | 1.947(2)     |
| <b>Fe1-N<sub>av</sub></b>   | 2.100                                          | 2.001        | 1.961        |
| <b>V / Å<sup>3</sup></b>    | 2854                                           | 2816         | 2761         |
| <b>Σ-Fe1</b>                | 62                                             | 47           | 48           |
| <b>⊖-Fe1</b>                | 193                                            | 137          | 123          |

**Table S2** Crystallographic data and structure refinement of all compounds.

|                                                 | <b>1</b> [Fe(qsal-Cl) <sub>2</sub> ]NO <sub>3</sub> ·MeOH                       |                                                                                 | <b>2</b> [Fe(qsal-Cl) <sub>2</sub> ]NO <sub>3</sub> ·EtOH                       |                                                                                 | <b>3</b> [Fe(qsal-Cl) <sub>2</sub> ]NO <sub>3</sub> ·1-PrOH                     |                                                                                 |
|-------------------------------------------------|---------------------------------------------------------------------------------|---------------------------------------------------------------------------------|---------------------------------------------------------------------------------|---------------------------------------------------------------------------------|---------------------------------------------------------------------------------|---------------------------------------------------------------------------------|
|                                                 | <b>150 K</b>                                                                    | <b>280 K</b>                                                                    | <b>150 K</b>                                                                    | <b>280 K</b>                                                                    | <b>150 K</b>                                                                    | <b>280 K</b>                                                                    |
| <b>Empirical formula</b>                        | C <sub>33</sub> H <sub>24</sub> Cl <sub>2</sub> FeN <sub>5</sub> O <sub>6</sub> | C <sub>33</sub> H <sub>24</sub> Cl <sub>2</sub> FeN <sub>5</sub> O <sub>6</sub> | C <sub>34</sub> H <sub>26</sub> Cl <sub>2</sub> FeN <sub>5</sub> O <sub>6</sub> | C <sub>34</sub> H <sub>26</sub> Cl <sub>2</sub> FeN <sub>5</sub> O <sub>6</sub> | C <sub>35</sub> Cl <sub>2</sub> FeH <sub>28</sub> N <sub>5</sub> O <sub>6</sub> | C <sub>35</sub> Cl <sub>2</sub> FeH <sub>28</sub> N <sub>5</sub> O <sub>6</sub> |
| <b>Formula weight/ gmol<sup>-1</sup></b>        | 713.32                                                                          | 713.32                                                                          | 727.366                                                                         | 727.366                                                                         | 741.37                                                                          | 741.37                                                                          |
| <b>Crystal system</b>                           | triclinic                                                                       | triclinic                                                                       | monoclinic                                                                      | monoclinic                                                                      | monoclinic                                                                      | monoclinic                                                                      |
| <b>Space group</b>                              | <i>P</i> $\bar{1}$                                                              | <i>P</i> $\bar{1}$                                                              | <i>P</i> 2 <sub>1</sub> / <i>c</i>                                              | <i>P</i> 2 <sub>1</sub> / <i>c</i>                                              | <i>I</i> 2/ <i>a</i>                                                            | <i>I</i> 2/ <i>a</i>                                                            |
| <b>a / Å</b>                                    | 10.27985(17)                                                                    | 10.27045(20)                                                                    | 9.7517(2)                                                                       | 9.86853(18)                                                                     | 19.1751(3)                                                                      | 19.3217(2)                                                                      |
| <b>b / Å</b>                                    | 12.74528(15)                                                                    | 12.7798(2)                                                                      | 25.8966(4)                                                                      | 25.6178(4)                                                                      | 11.0201(2)                                                                      | 11.0517(2)                                                                      |
| <b>c / Å</b>                                    | 23.5809(3)                                                                      | 24.3948(4)                                                                      | 12.1742(1)                                                                      | 12.45218(18)                                                                    | 29.7982(5)                                                                      | 30.1028(5)                                                                      |
| <b>α / °</b>                                    | 94.8650(10)                                                                     | 96.6399(13)                                                                     | 90                                                                              | 90                                                                              | 90                                                                              | 90                                                                              |
| <b>β / °</b>                                    | 99.1577(12)                                                                     | 100.2941(14)                                                                    | 99.275(1)                                                                       | 96.8585(16)                                                                     | 90.4220(10)                                                                     | 90.3700(10)                                                                     |
| <b>γ / °</b>                                    | 99.9168(12)                                                                     | 100.1584(16)                                                                    | 90                                                                              | 90                                                                              | 90                                                                              | 90                                                                              |
| <b>V</b>                                        | 2984.54(7)                                                                      | 3064.99(9)                                                                      | 3034.23(8)                                                                      | 3125.52(9)                                                                      | 6296.53(18)                                                                     | 6427.95(17)                                                                     |
| <b>Z</b>                                        | 4                                                                               | 4                                                                               | 4                                                                               | 4                                                                               | 8                                                                               | 8                                                                               |
| <b>Absorption coefficient / mm<sup>-1</sup></b> | 6.185                                                                           | 6.023                                                                           | 6.096                                                                           | 5.918                                                                           | 5.887                                                                           | 5.767                                                                           |
| <b>Reflections collected</b>                    | 46286                                                                           | 34803                                                                           | 23307                                                                           | 49448                                                                           | 24396                                                                           | 25999                                                                           |
| <b>Independent reflections, R<sub>int</sub></b> | 10931, 0.0642                                                                   | 7701, 0.1016                                                                    | 5553, 0.0509                                                                    | 5694, 0.0598                                                                    | 5757, 0.0381                                                                    | 5880, 0.0282                                                                    |
| <b>Max. and min. transmission</b>               | -                                                                               | -                                                                               | -                                                                               | -                                                                               | -                                                                               | -                                                                               |
| <b>Restraints/parameters</b>                    | 70/1070                                                                         | 36/851                                                                          | 21/474                                                                          | 6/415                                                                           | 21/417                                                                          | 20/417                                                                          |
| <b>Final R indices [I&gt;=2σ (I)]</b>           | 0.0480                                                                          | 0.0618                                                                          | 0.0729                                                                          | 0.0738                                                                          | 0.0568                                                                          | 0.0560                                                                          |
| <b>R<sub>1</sub>, wR<sub>2</sub></b>            | 0.1287                                                                          | 0.1687                                                                          | 0.2040                                                                          | 0.1978                                                                          | 0.1584                                                                          | 0.1747                                                                          |
| <b>CCDC No.</b>                                 | 2175688                                                                         | 2175687                                                                         | 2175689                                                                         | 2175690                                                                         | 2175691                                                                         | 2175692                                                                         |

|                                                 | <b>2ns [Fe(qsal-Cl)<sub>2</sub>]NO<sub>3</sub></b>                              |                                                                                 |                                                                                 |
|-------------------------------------------------|---------------------------------------------------------------------------------|---------------------------------------------------------------------------------|---------------------------------------------------------------------------------|
|                                                 | <b>360 K</b>                                                                    | <b>320 K</b>                                                                    | <b>200 K</b>                                                                    |
| <b>Empirical formula</b>                        | C <sub>32</sub> H <sub>20</sub> Cl <sub>2</sub> FeN <sub>5</sub> O <sub>5</sub> | C <sub>32</sub> H <sub>20</sub> Cl <sub>2</sub> FeN <sub>5</sub> O <sub>5</sub> | C <sub>32</sub> H <sub>20</sub> Cl <sub>2</sub> FeN <sub>5</sub> O <sub>5</sub> |
| <b>Formula weight/ gmol<sup>-1</sup></b>        | 681.28                                                                          | 681.28                                                                          | 681.28                                                                          |
| <b>Crystal system</b>                           | monoclinic                                                                      | monoclinic                                                                      | monoclinic                                                                      |
| <b>Space group</b>                              | P2 <sub>1</sub> /n                                                              | P2 <sub>1</sub> /n                                                              | P2 <sub>1</sub> /n                                                              |
| <b>a / Å</b>                                    | 13.6679(2)                                                                      | 13.3494(3)                                                                      | 13.13396(19)                                                                    |
| <b>b / Å</b>                                    | 15.2712(2)                                                                      | 15.3915(3)                                                                      | 15.36840(17)                                                                    |
| <b>c / Å</b>                                    | 14.5271(2)                                                                      | 14.4332(3)                                                                      | 14.35516(19)                                                                    |
| <b>α / °</b>                                    | 90                                                                              | 90                                                                              | 90                                                                              |
| <b>β / °</b>                                    | 109.7236(19)                                                                    | 108.239(2)                                                                      | 107.6913(15)                                                                    |
| <b>γ / °</b>                                    | 90                                                                              | 90                                                                              | 90                                                                              |
| <b>V</b>                                        | 2854.28(8)                                                                      | 2816.56(10)                                                                     | 2760.52(7)                                                                      |
| <b>Z</b>                                        | 4                                                                               | 4                                                                               | 4                                                                               |
| <b>Absorption coefficient / mm<sup>-1</sup></b> | 6.412                                                                           | 6.498                                                                           | 6.630                                                                           |
| <b>Reflections collected</b>                    | 22988                                                                           | 21258                                                                           | 21967                                                                           |
| <b>Independent reflections,</b>                 | 5307                                                                            | 5240                                                                            | 0.0443                                                                          |
| <b>R<sub>int</sub></b>                          | 0.0473                                                                          | 0.0509                                                                          |                                                                                 |
| <b>Max. and min. transmission</b>               | 0.853                                                                           | 1.000                                                                           | 0.708                                                                           |
| <b>Restraints/parameters</b>                    | 18/406                                                                          | 18/406                                                                          | 0/406                                                                           |
| <b>Final R indices [I&gt;=2σ (I)]</b>           | 0.0496                                                                          | 0.0435                                                                          | 0.0371                                                                          |
| <b>R<sub>1</sub>, wR<sub>2</sub></b>            | 0.1435                                                                          | 0.1108                                                                          | 0.1009                                                                          |
| <b>CCDC No.</b>                                 | 2175695                                                                         | 2175693                                                                         | 2175694                                                                         |

**Table S3** Intermolecular interactions of all compounds (Å).

|                         |                                    | 1                                                |        | 2                                                |       | 3                                                  |        |
|-------------------------|------------------------------------|--------------------------------------------------|--------|--------------------------------------------------|-------|----------------------------------------------------|--------|
|                         |                                    | [Fe(qsal-Cl) <sub>2</sub> ]NO <sub>3</sub> ·MeOH |        | [Fe(qsal-Cl) <sub>2</sub> ]NO <sub>3</sub> ·EtOH |       | [Fe(qsal-Cl) <sub>2</sub> ]NO <sub>3</sub> ·1-PrOH |        |
|                         |                                    | 150 K                                            | 280 K  | 150 K                                            | 280 K | 150 K                                              | 280 K  |
| <b><u>1D chains</u></b> |                                    |                                                  |        |                                                  |       |                                                    |        |
| <b>Fe-Fe</b>            |                                    |                                                  |        |                                                  |       |                                                    |        |
|                         | $\pi$ - $\pi$ (Type A – Fe1-Fe1)   | 3.295                                            | 3.259  | 3.363                                            | 3.386 | 3.373                                              | 3.345  |
|                         | $\pi$ - $\pi$ (Type B – Fe2-Fe2)   | 3.221                                            | 3.368  | -                                                | -     | -                                                  | -      |
|                         | $\pi$ - $\pi$ (Type C – Fe1-Fe2)   | 3.339                                            | 3.293  | -                                                | -     | -                                                  | -      |
|                         | C-H...O                            | 2.484                                            | 2.616  | 2.467                                            | 2.457 | -                                                  | -      |
|                         | C-H...O                            | 2.645                                            | 2.722  | 2.580                                            | 2.703 | -                                                  | -      |
|                         | C-H...Cl                           | 2.869                                            | 2.904  | -                                                | -     | 3.281                                              | 3.296  |
|                         | Fe-Fe (Type A)                     | 6.856                                            | 6.926  | 7.161                                            | 7.044 | 7.011                                              | 7.061  |
|                         | Fe-Fe (Type B)                     | 7.774                                            | 7.654  | 6.984                                            | 7.044 | 10.330                                             | 9.368  |
| <b>ROH</b>              | OH <sub>e</sub> ...C-H             | 2.539                                            | 2.681  | 2.704                                            | **    | **                                                 | **     |
|                         | OH <sub>e</sub> ...ON              | 2.159                                            | 2.501  | 2.051                                            | **    | **                                                 | **     |
| <b>NO<sub>3</sub></b>   | O...C-H                            | 2.516                                            | 2.675  | 2.576                                            | 2.592 | 2.549                                              | 2.601* |
| <b><u>2D plane</u></b>  |                                    |                                                  |        |                                                  |       |                                                    |        |
|                         | $\pi$ - $\pi$                      | 3.484                                            | 3.471* | -                                                | -     | -                                                  | -      |
|                         | C-H...Cl                           | 3.098                                            | 3.073  | 3.017                                            | 3.061 | 3.275                                              | 3.285  |
|                         | O...Cl                             | 3.114                                            | 3.229  | -                                                | -     | -                                                  | -      |
|                         | P4AE (CH...C <sub>centroid</sub> ) | -                                                | -      | -                                                | -     | 2.830                                              | 2.909  |
|                         | P4AE ( $\pi$ - $\pi$ , quin-quin)  | -                                                | -      | -                                                | -     | 3.497                                              | 3.526  |
| <b>NO<sub>3</sub></b>   | NO...CH                            | 2.380                                            | 2.378  | 2.576                                            | 2.534 | 2.538                                              | 2.395  |



| <b>3D structure</b>   |          |       |        |       |       |       |       |
|-----------------------|----------|-------|--------|-------|-------|-------|-------|
|                       | C-H...Cl | 2.960 | 3.073* | 3.017 | 3.061 | -     | -     |
| <b>NO<sub>3</sub></b> | NO...CH  | 2.286 | 2.378  | 2.605 | 2.608 | 2.606 | 2.713 |

\*Disorder in the group

\*\* Solvent mask used in the refinement.

|                            |                                  | 2ns<br>[Fe(qsal-Cl) <sub>2</sub> ]NO <sub>3</sub> |        |        |
|----------------------------|----------------------------------|---------------------------------------------------|--------|--------|
|                            |                                  | 360 K                                             | 320 K  | 200 K  |
| <b><u>1D chains</u></b>    |                                  |                                                   |        |        |
| <b>Fe-Fe</b>               |                                  |                                                   |        |        |
|                            | $\pi$ - $\pi$ (Type A – Fe1-Fe1) | 3.499                                             | 3.477  | 3.459  |
|                            | $\pi$ - $\pi$ (Type B – Fe2-Fe2) | -                                                 | -      | -      |
|                            | $\pi$ - $\pi$ (Type C – Fe1-Fe2) | -                                                 | -      | -      |
|                            | C-H...O                          | 2.701                                             | 2.647  | 2.583  |
|                            | Cl...O                           | 3.170                                             | 3.225  | 3.202  |
|                            | Fe-Fe (Type A)                   | 6.760                                             | 6.906  | 6.930  |
|                            | Fe-Fe (Type B)                   | 10.398                                            | 10.515 | 10.529 |
| <b>NO<sub>3</sub></b>      | O...C-H                          | 2.681                                             | 2.537  | 2.450  |
| <b><u>2D plane</u></b>     |                                  |                                                   |        |        |
| <b>NO<sub>3</sub></b>      | NO...CH                          | 2.477                                             | 2.409  | 2.348  |
| <b><u>3D structure</u></b> |                                  |                                                   |        |        |
|                            | C-H...Cl                         | 2.898                                             | 2.863  | 2.807  |
|                            | C-H... $\pi$                     | 2.592                                             | 2.560  | 2.524  |
|                            | $\pi$ - $\pi$                    | 3.362                                             | 3.351  | 3.311  |
| <b>NO<sub>3</sub></b>      | NO...CH                          | 2.493                                             | 2.552  | 2.369  |

**Table S4** Distances between the chains ( $d_{\text{chain}}$ ) and the planes ( $d_{\text{plane}}$ ) at different temperatures.

|                                                             | T = 150 K              |                        | T = 280 K              |                        |
|-------------------------------------------------------------|------------------------|------------------------|------------------------|------------------------|
|                                                             | $d_{\text{chain}}$ (Å) | $d_{\text{plane}}$ (Å) | $d_{\text{chain}}$ (Å) | $d_{\text{plane}}$ (Å) |
| <b>1</b> [Fe(qsal-Cl) <sub>2</sub> ]NO <sub>3</sub> ·MeOH   | 12.475                 | 10.280                 | 12.780                 | 10.270                 |
| <b>2</b> [Fe(qsal-Cl) <sub>2</sub> ]NO <sub>3</sub> ·EtOH   | 9.752                  | 13.687                 | 9.869                  | 13.696                 |
| <b>3</b> [Fe(qsal-Cl) <sub>2</sub> ]NO <sub>3</sub> ·1-PrOH | 11.020                 | 18.611                 | 11.052                 | 18.769                 |
|                                                             | T = 200 K              |                        | T = 360 K              |                        |
| <b>2ns</b> [Fe(qsal-Cl) <sub>2</sub> ]NO <sub>3</sub>       | 15.368                 | 14.355                 | 15.271                 | 14.527                 |

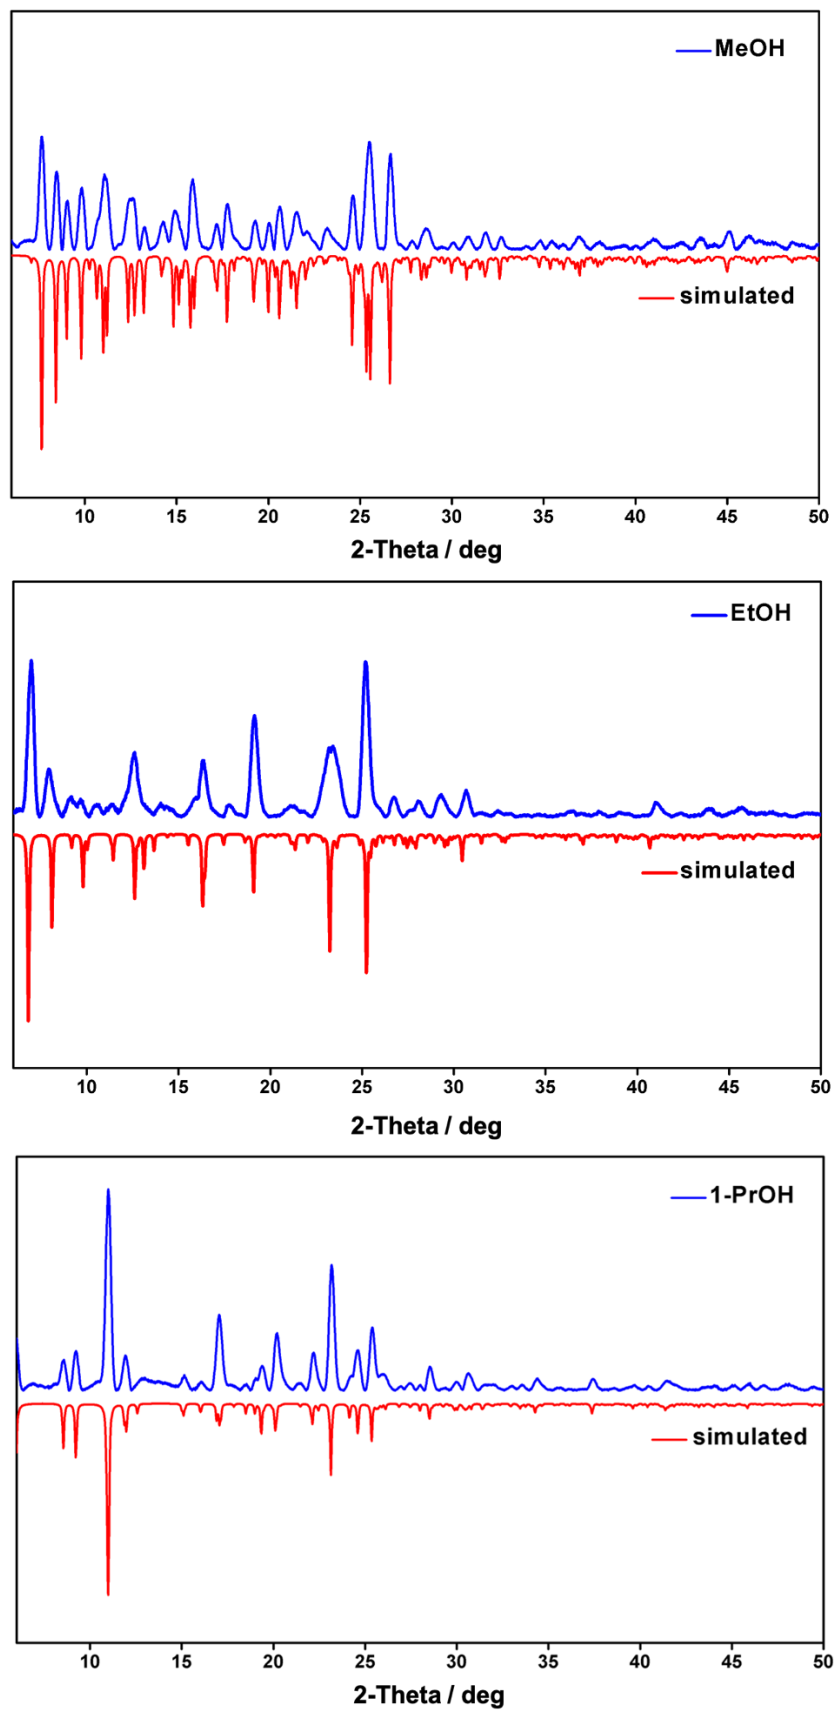

**Figure S1.** Experimental PXRD diffractograms (blue) and the corresponding simulated patterns (red) for **1-3**.

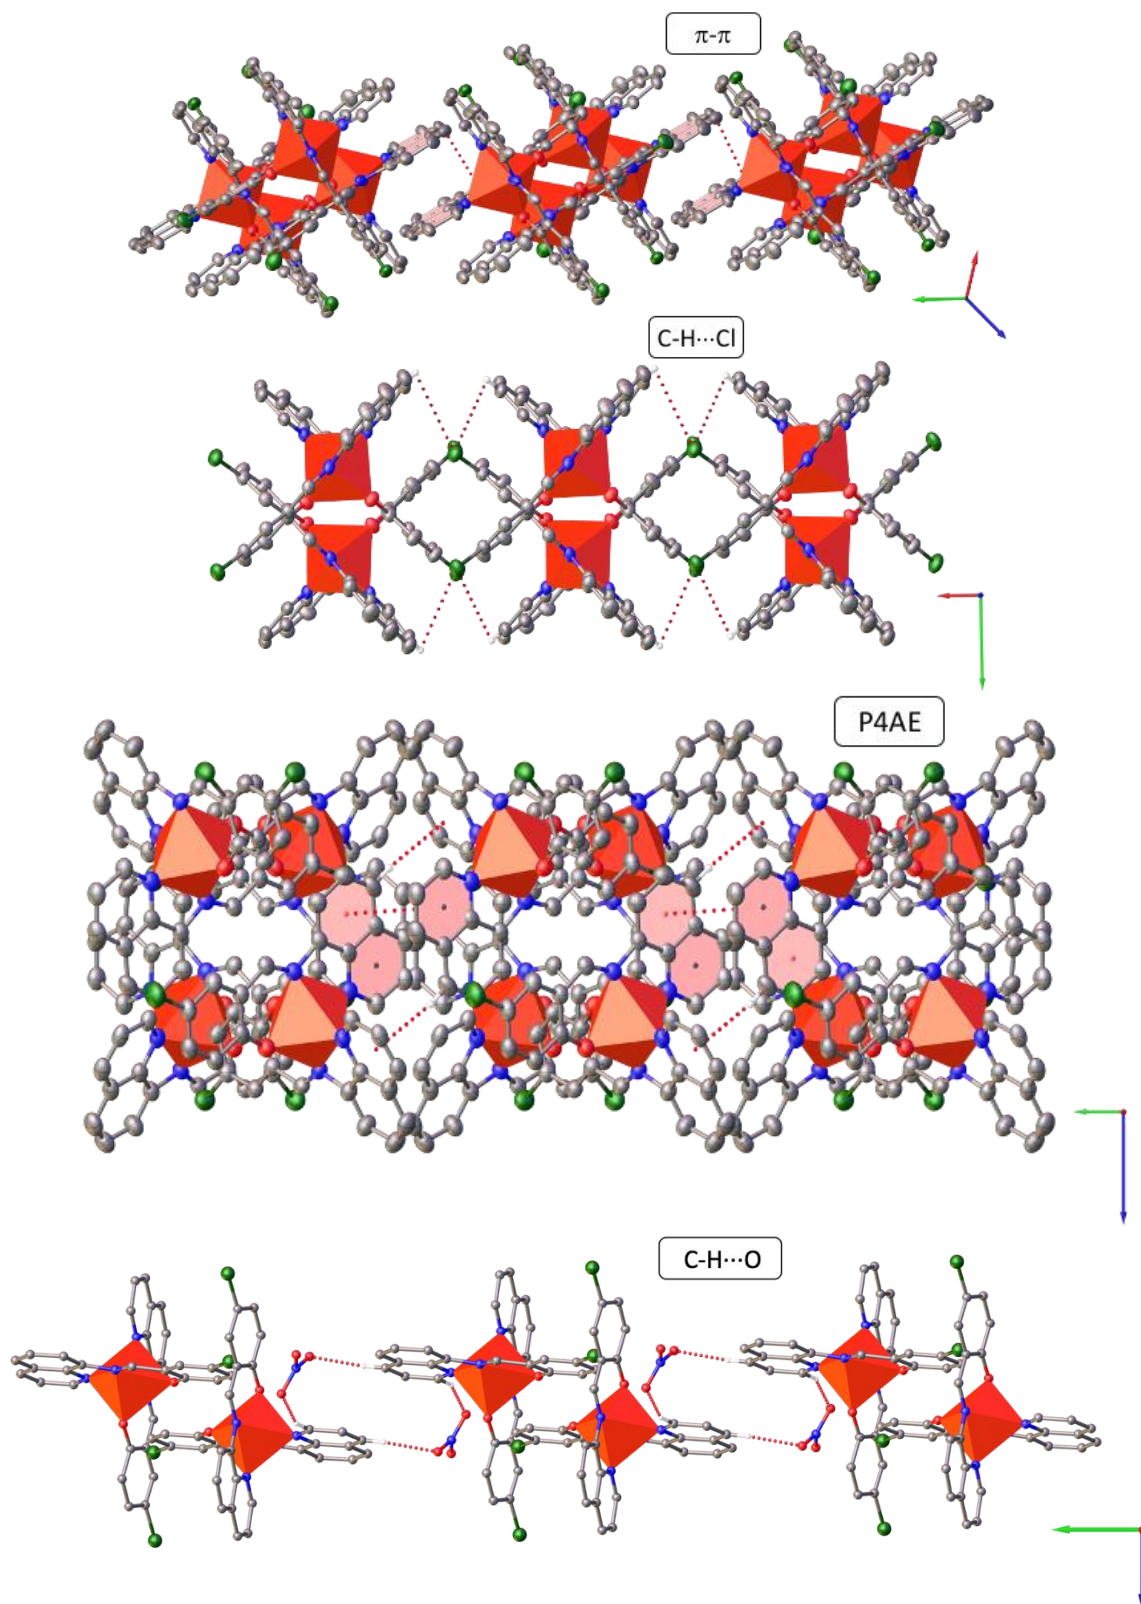

**Figure S2.** Structure representation of the 2D supramolecular interactions connecting the chains of iron (III) for **1** (top), **2** (middle-top), **3** (middle-bottom) and **2ns** (bottom) at 150 K (**1-3**) and 200 K (**2ns**).

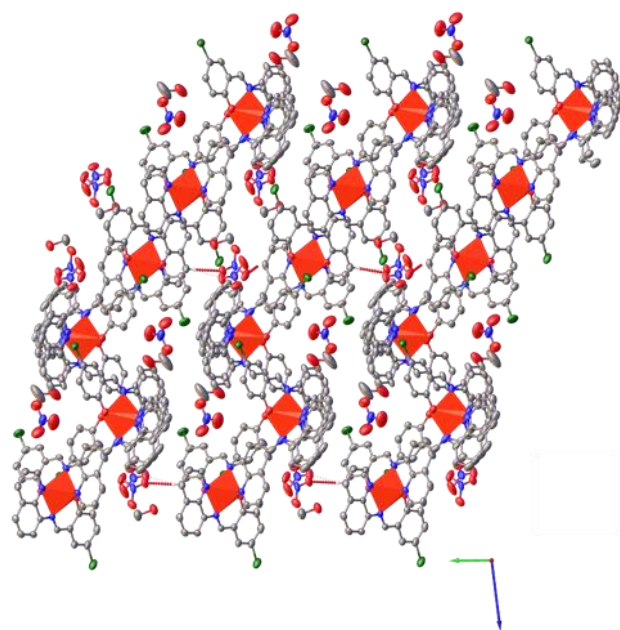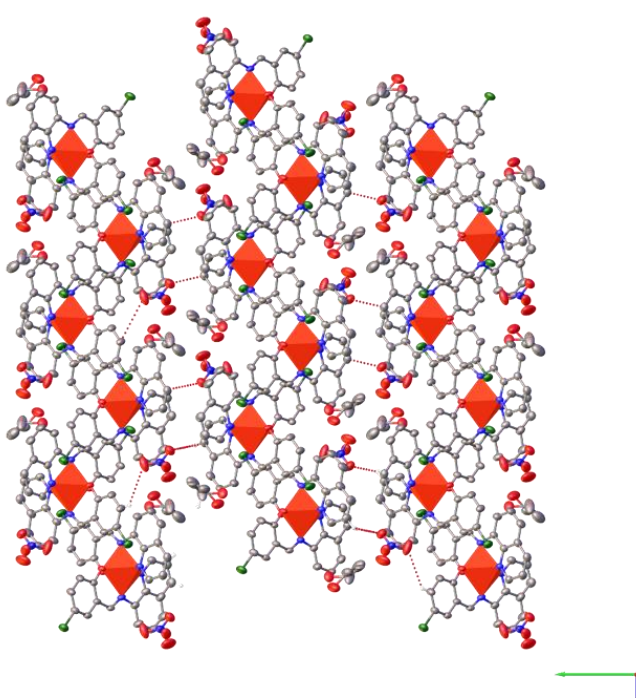

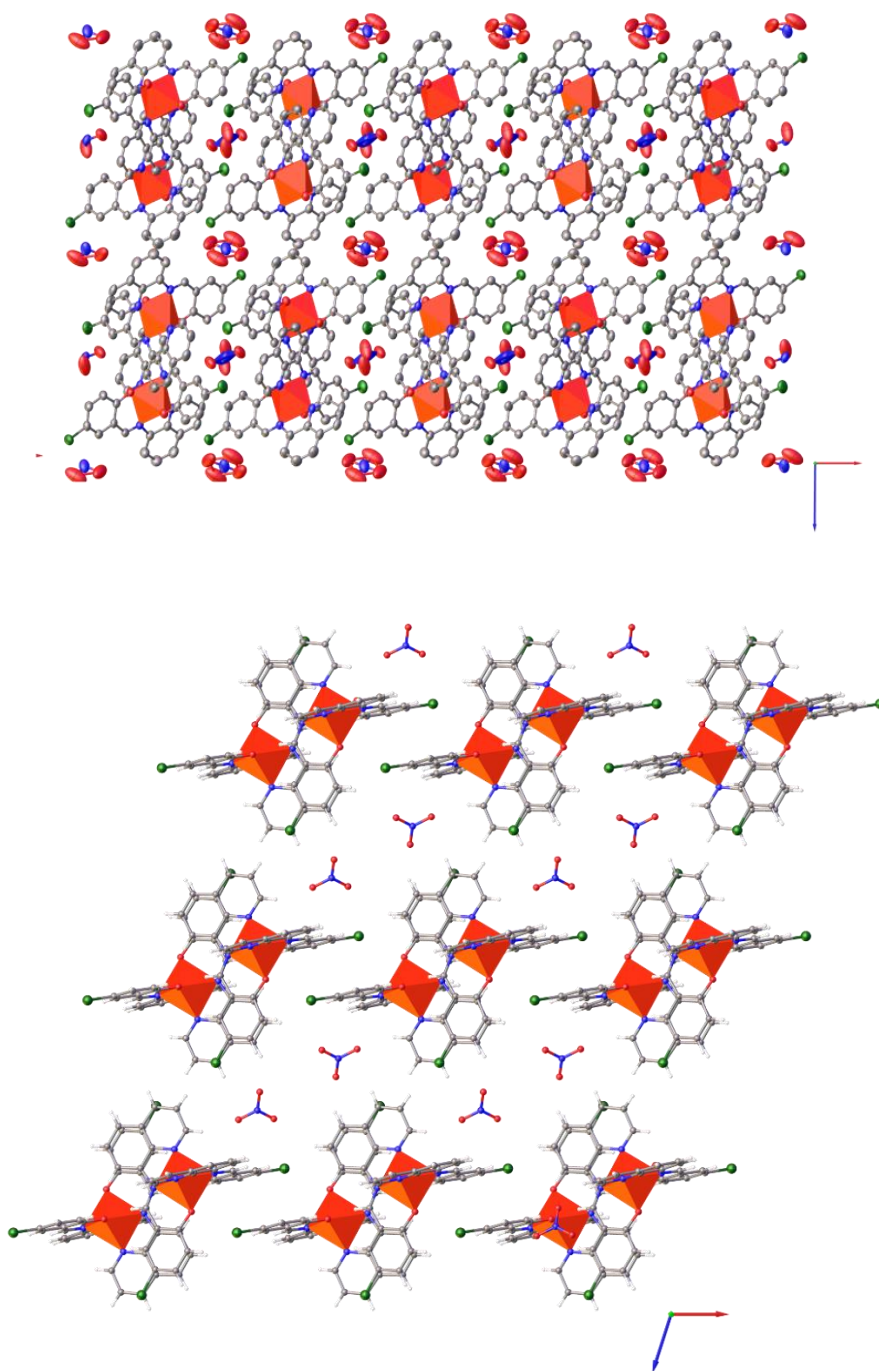

**Figure S3.** Structure representation of the 3D structure connecting the planes by nitrate molecules for **1** (top), **2** (middle-top), **3** (middle-bottom) and **2ns** (bottom) at 150 K (**1-3**) and 200 K (**2ns**).

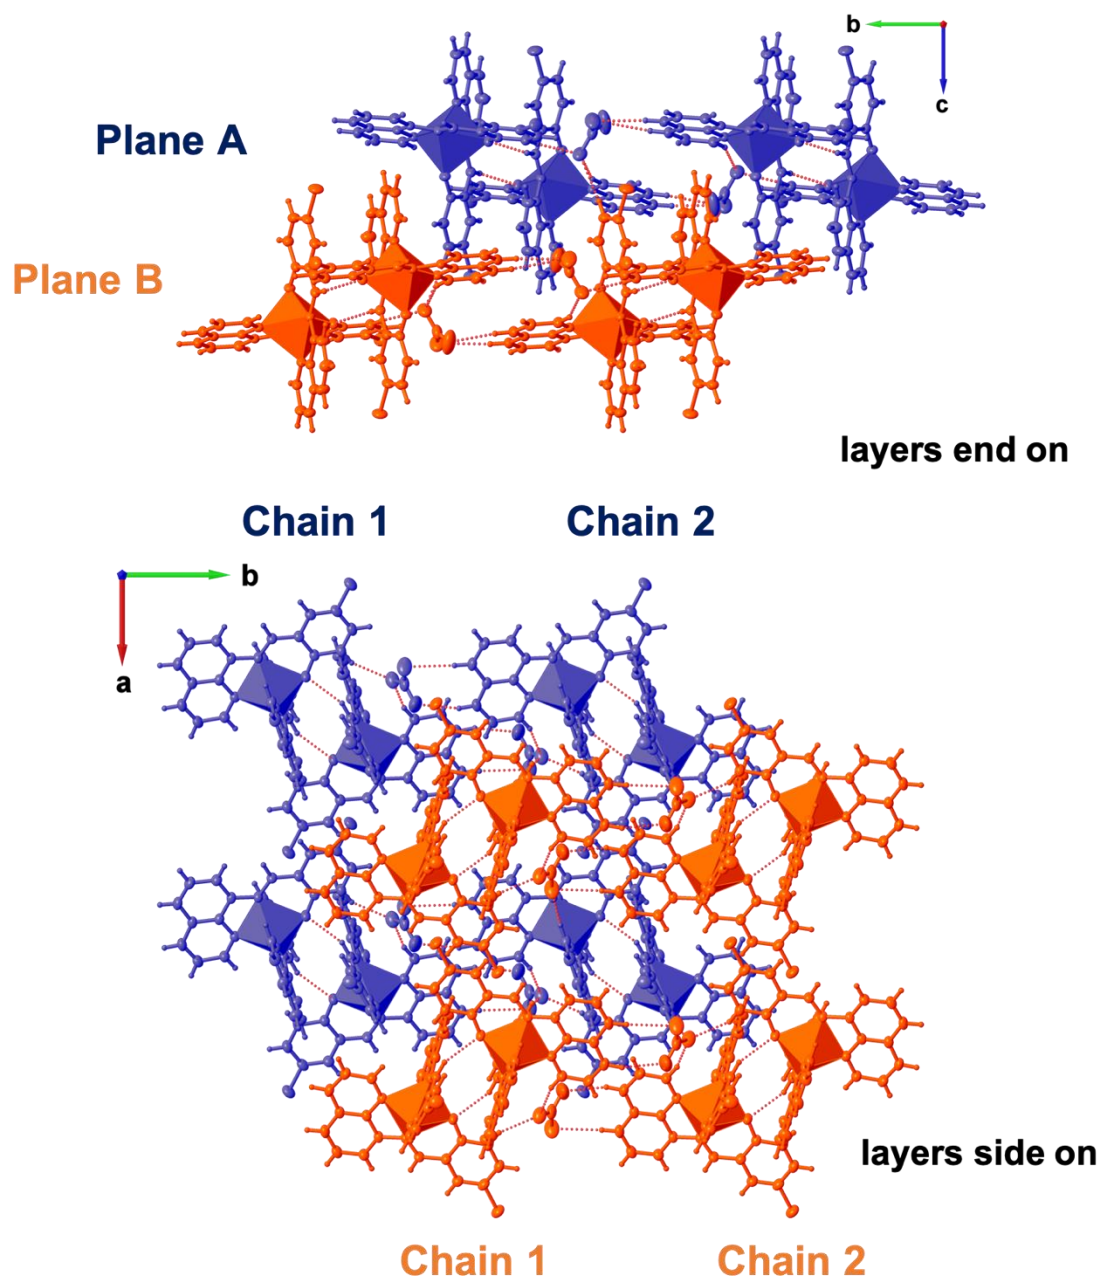

**Figure S4.** Structure representation of the 3D structure for 2ns with layers end on view (top) and layers side on view (bottom) for **2ns** at 200 K.



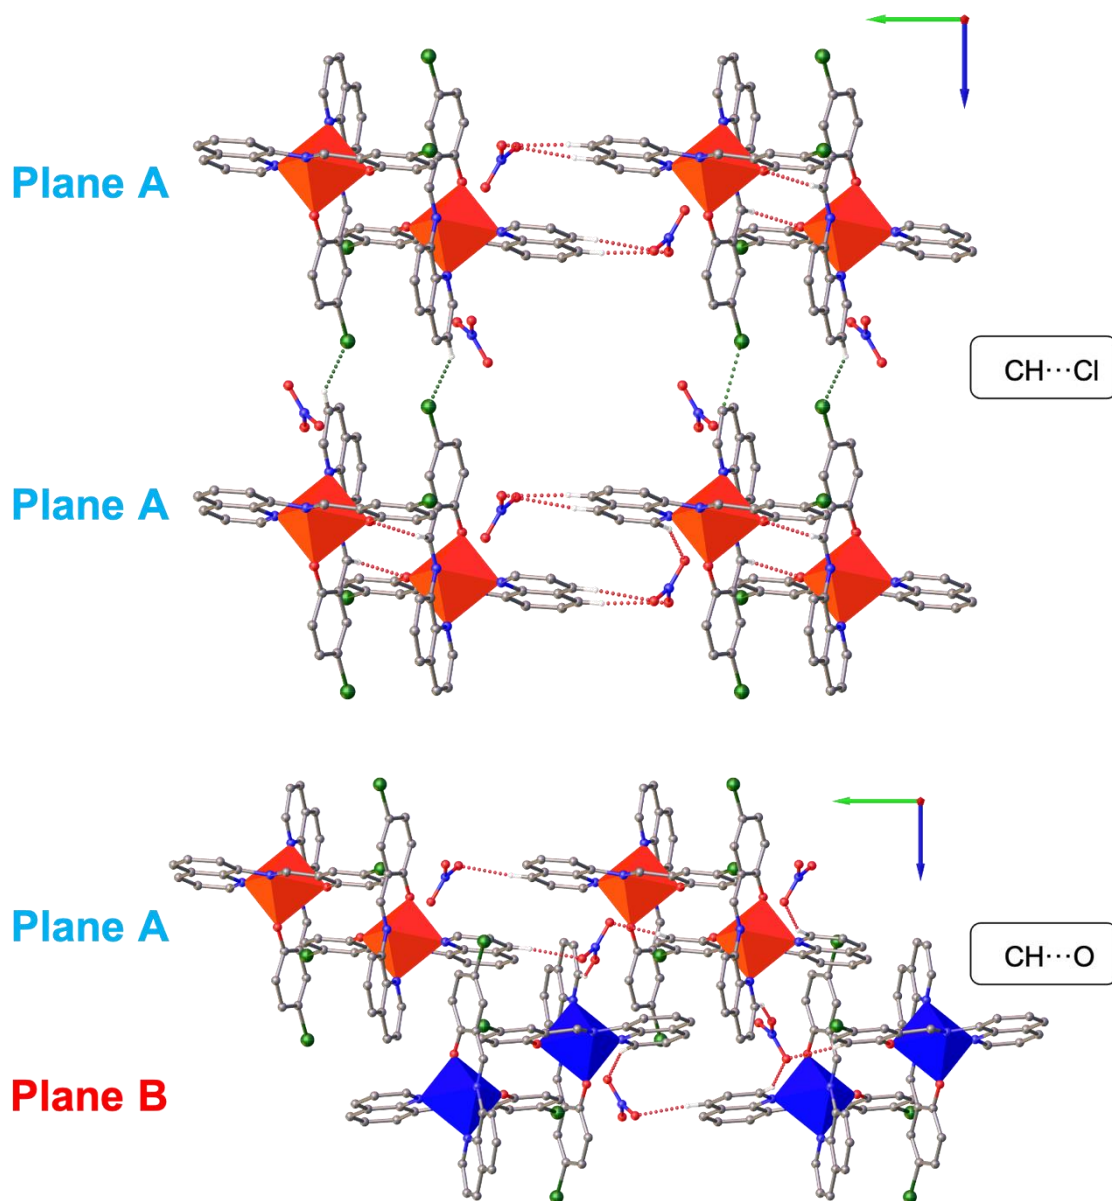

**Figure S5.** Structure representation of the 3D structure for **2ns** with plane A to plane A interactions and plane A to plane B interactions at 200 K.

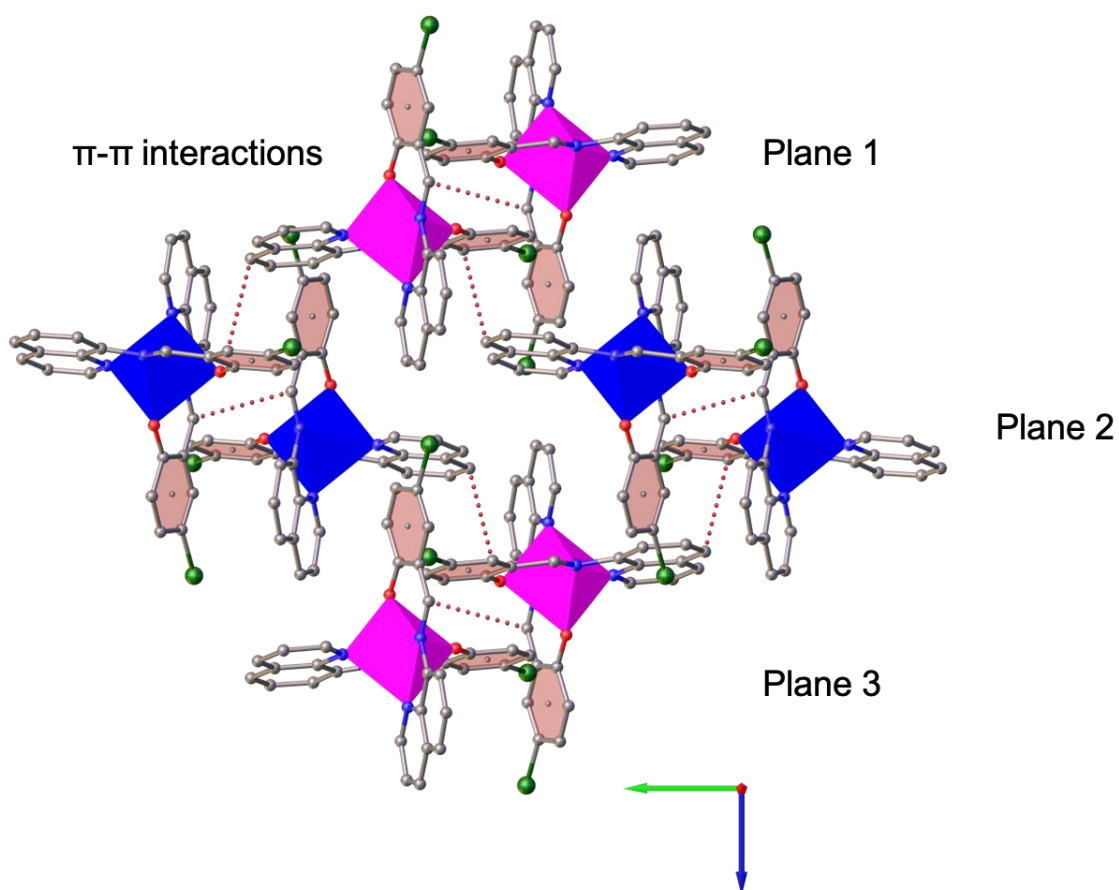

**Figure S6.** Structure representation of the 3D structure connecting the planes by  $\pi$ - $\pi$  interactions for **2ns** at 200 K.

**Table S5.** Intermolecular interactions contributions for **1-2** calculated by Hirshfeld surface at different temperatures.

| Complex                                                   | T(K) | H...H | H...Cl | H...O | H...C | C...C | C...Cl | O...Cl | Cl...Cl | Other |
|-----------------------------------------------------------|------|-------|--------|-------|-------|-------|--------|--------|---------|-------|
| <b>1</b> [Fe(qsal-Cl) <sub>2</sub> ]NO <sub>3</sub> ·MeOH | 150  | 36.7  | 9.9    | 20.4  | 14.3  | 6.9   | 8.4    | 1.3    | 0       | 2.1   |
|                                                           | 280  | 37.5  | 10.2   | 18.9  | 14.0  | 6.8   | 8.5    | 1.6    | 0       | 2.5   |
| <b>2</b> [Fe(qsal-Cl) <sub>2</sub> ]NO <sub>3</sub> ·EtOH | 150  | 34.0  | 6.1    | 24.5  | 13.9  | 8.0   | 9.9    | 0.6    | 1.5     | 2.5   |
|                                                           | 280* |       |        |       |       |       |        |        |         |       |
| <b>2ns</b> [Fe(qsal-Cl) <sub>2</sub> ]NO <sub>3</sub>     | 200  | 27.0  | 11.8   | 20.8  | 21.8  | 7.8   | 6.2    | 2.0    | 0.0     | 2.6   |
|                                                           | 360  | 26.8  | 11.8   | 21.1  | 20.3  | 8.5   | 5.5    | 2.5    | 0.0     | 3.5   |

\*Solvent mask used in the refinement

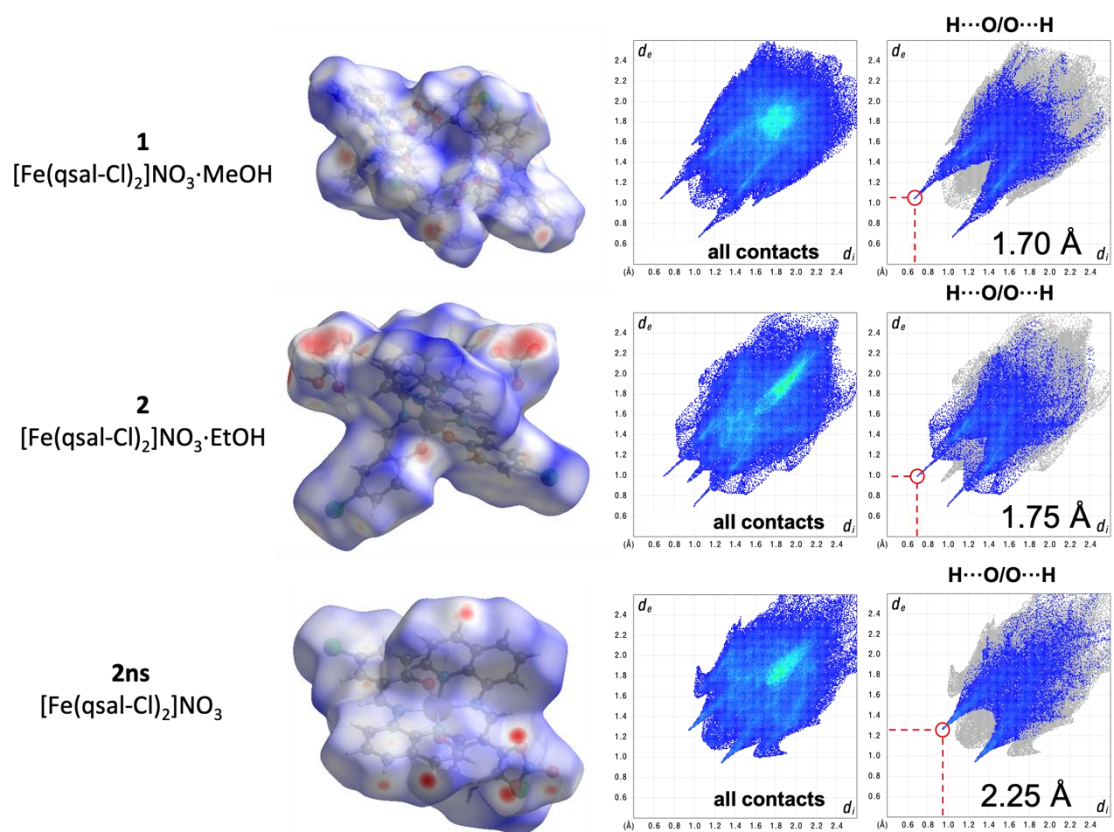

**Figure S7.** Hirshfeld surface mapped with  $d_{\text{norm}}$  (left) and 2D fingerprint of all contacts and O...H interactions for **1**, **2** and **2n**.

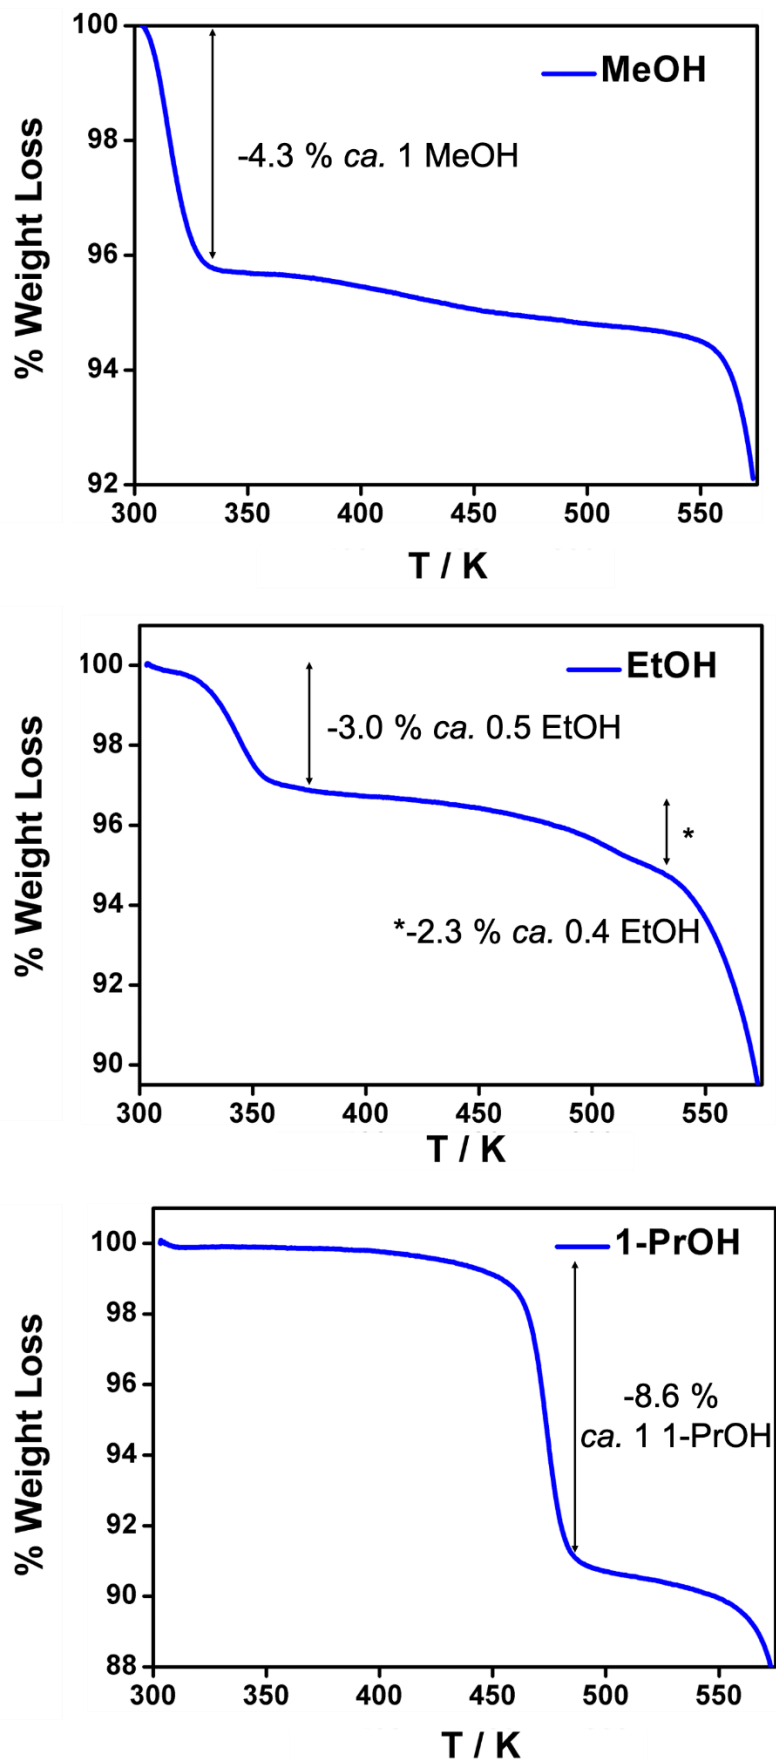

Figure S8. TGA curves for 1-3, with the assigned mass losses.

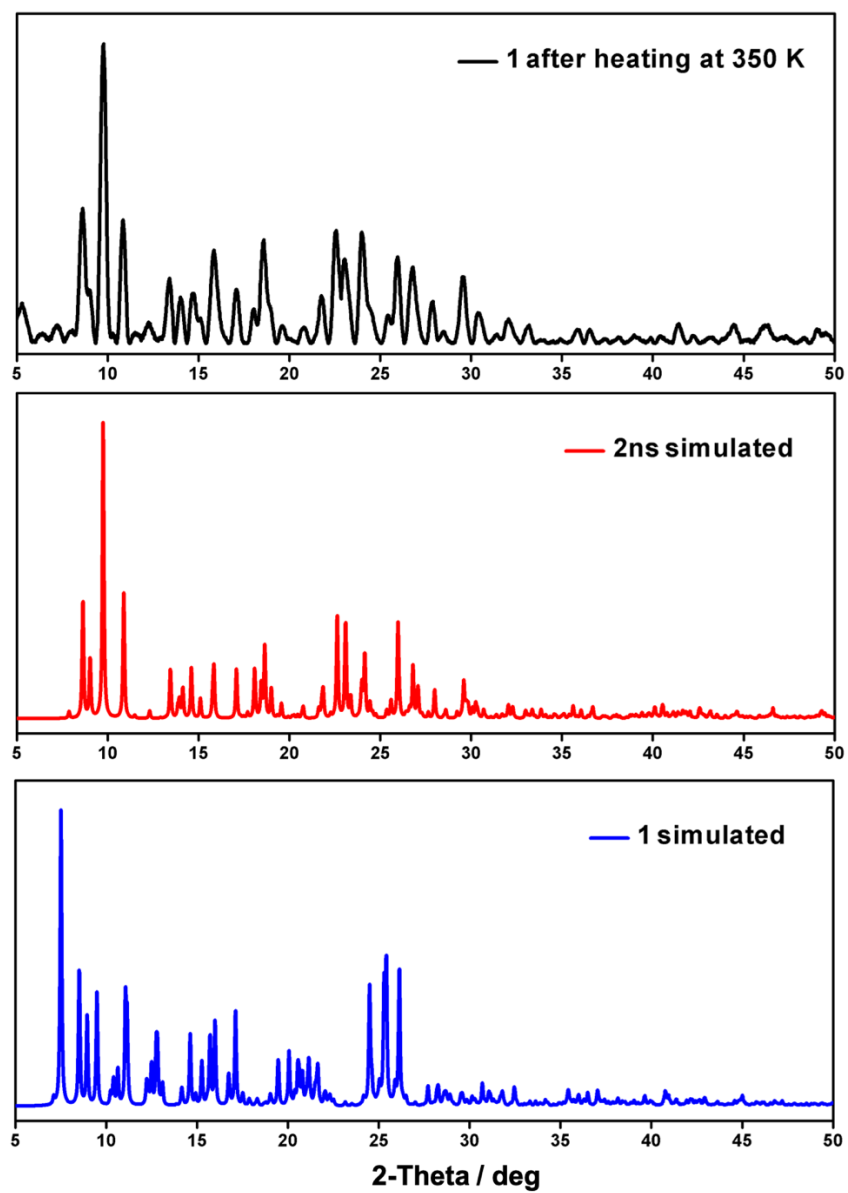

**Figure S9.** Experimental PXRD diffractogram of **1** after heating at 350 K and the corresponding simulated patterns of solvated complex **1** and **2ns** (non-solvated).

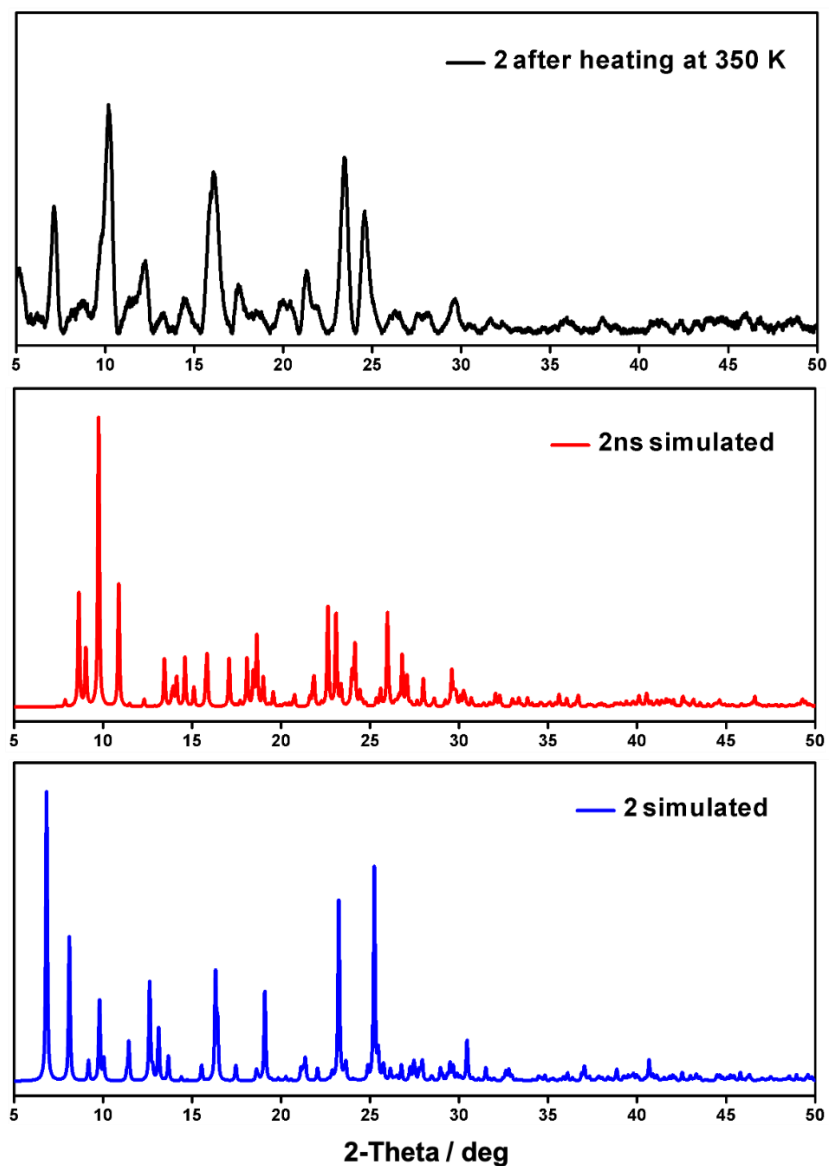

**Figure S10.** Experimental PXRD diffractogram of **2** after heating at 350 K and the corresponding simulated patterns of solvated complex **2** and **2ns** (non-solvated).

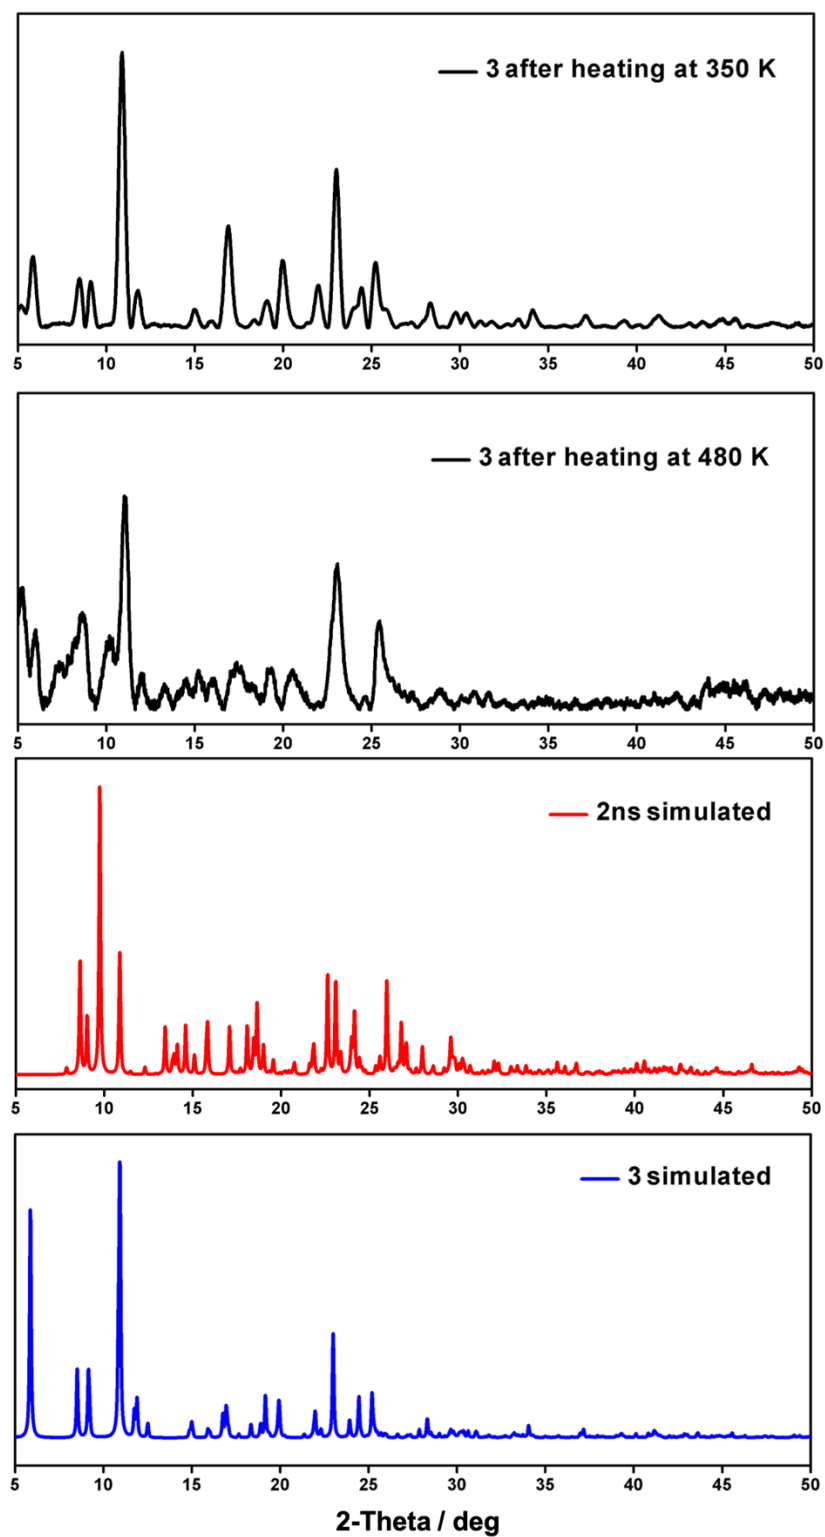

**Figure S11.** Experimental PXRD diffractogram of **3** after heating at 350 K and 480K, and the corresponding simulated patterns of solvated complex **3** and **2ns** (non-solvated).

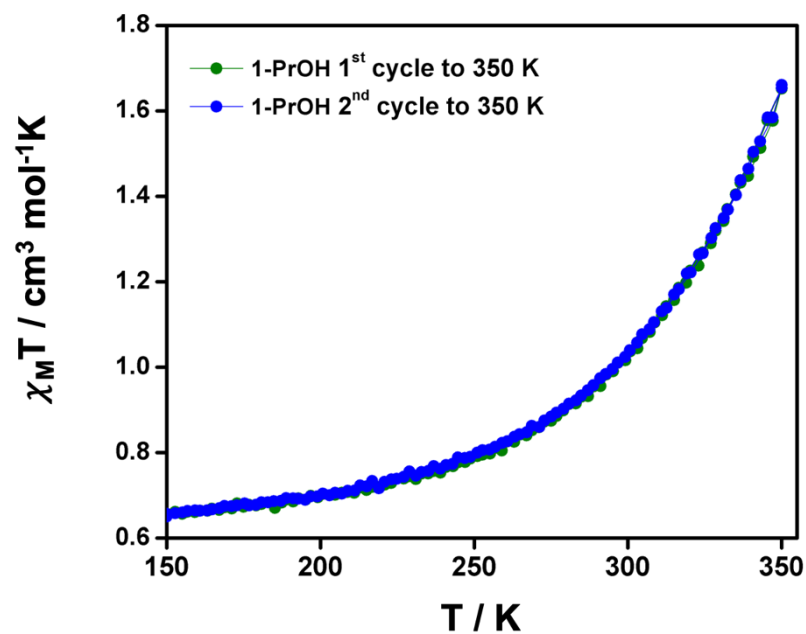

Figure S12. Thermal variation of  $\chi_M T$  versus  $T$  plots for **3** at different cycles.

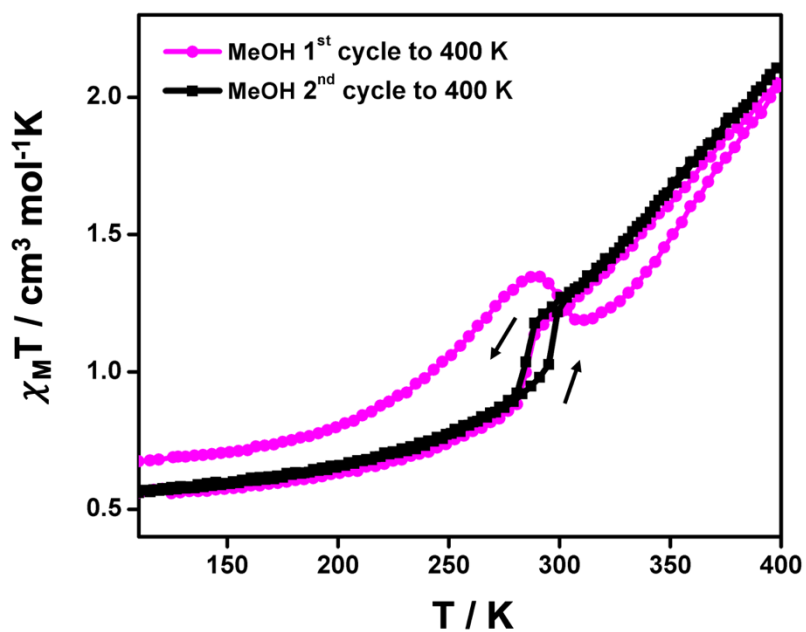

Figure S13. Thermal variation of  $\chi_M T$  versus  $T$  plots for **1** at different cycles.



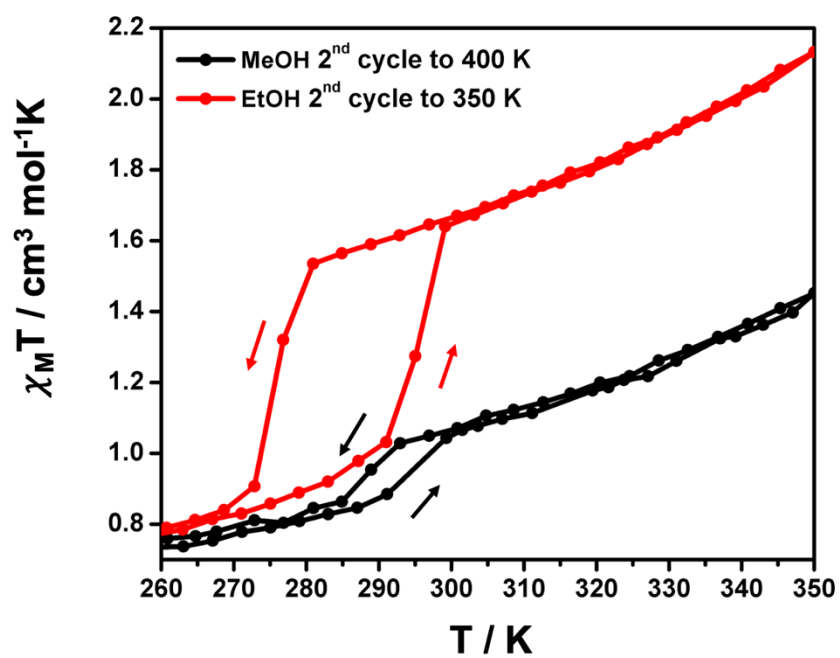

Figure S14. Thermal variation of  $\chi_{\text{M}}T$  versus  $T$  plots for 1 and 2 at the 2<sup>nd</sup> cycle.

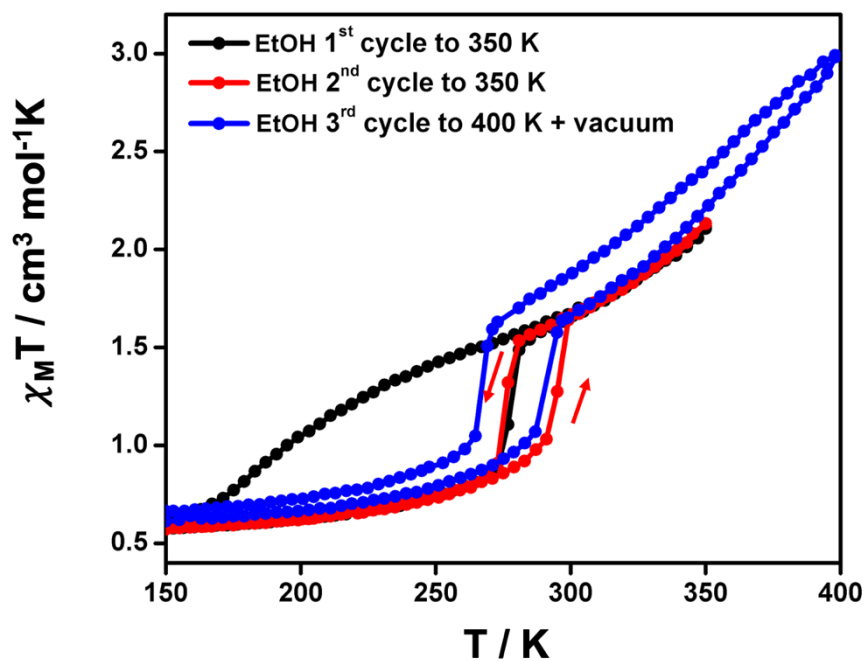

Figure S15. Thermal variation of  $\chi_{\text{M}}T$  versus  $T$  plots for 2 at different cycles.

**Table S6** Comparison of DFT optimized and experimental (in parenthesis) average bond lengths (Å) and volume cells (Å<sup>3</sup>) for the low- and high- spin states for compounds **1** and **2**. CIF files of the optimized structures are available as ESI.

|                                       | <b>1</b> [Fe(qsal-Cl) <sub>2</sub> ]NO <sub>3</sub> ·MeOH |           | <b>2</b> [Fe(qsal-Cl) <sub>2</sub> ]NO <sub>3</sub> ·EtOH |               |
|---------------------------------------|-----------------------------------------------------------|-----------|-----------------------------------------------------------|---------------|
|                                       | <b>LS</b>                                                 | <b>HS</b> | <b>LS</b>                                                 | <b>HS</b>     |
| <b>Fe-O<sub>ph</sub><sub>av</sub></b> | 1.901 (1.874)                                             | 1.947     | 1.841 (1.885)                                             | 1.946 (1.904) |
| <b>Fe-N<sub>av</sub></b>              | 1.955 (1.953)                                             | 2.162     | 1.909 (1.975)                                             | 2.171 (2.120) |
| <b>volume</b>                         | 2958 (2984)                                               | 3036      | 3021 (3034)                                               | 3039 (3125)   |

**1 : [Fe(qsal-Cl)<sub>2</sub>]NO<sub>3</sub>·MeOH**

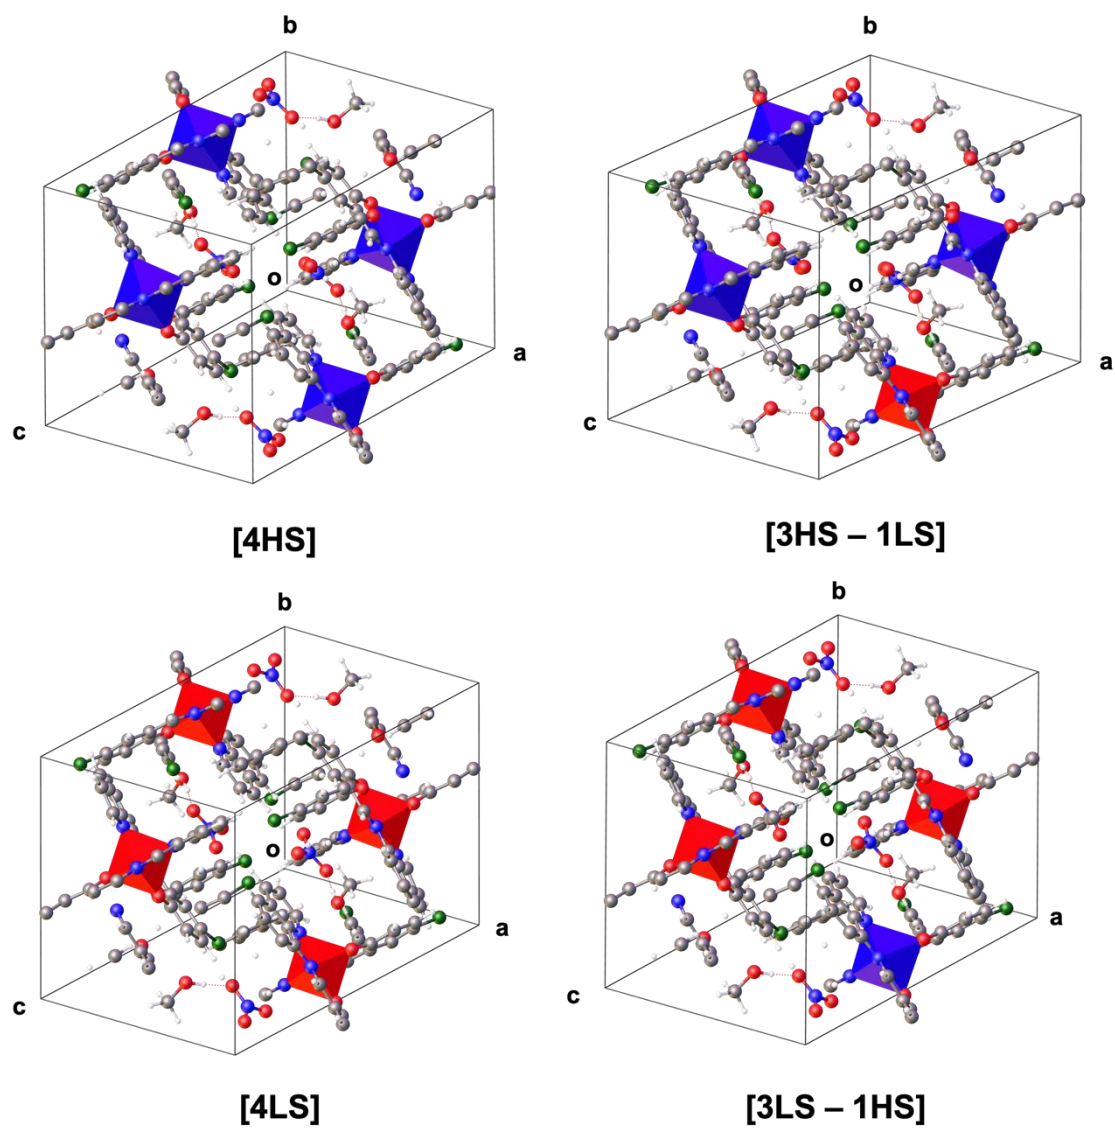

**Figure S16.** Unit cell of the optimized structures of **1** with [4HS] and [3HS-1LS] (top) [4LS] and [3LS-1HS] (bottom).

**2 : [Fe(qsal-Cl)<sub>2</sub>]NO<sub>3</sub>·EtOH**

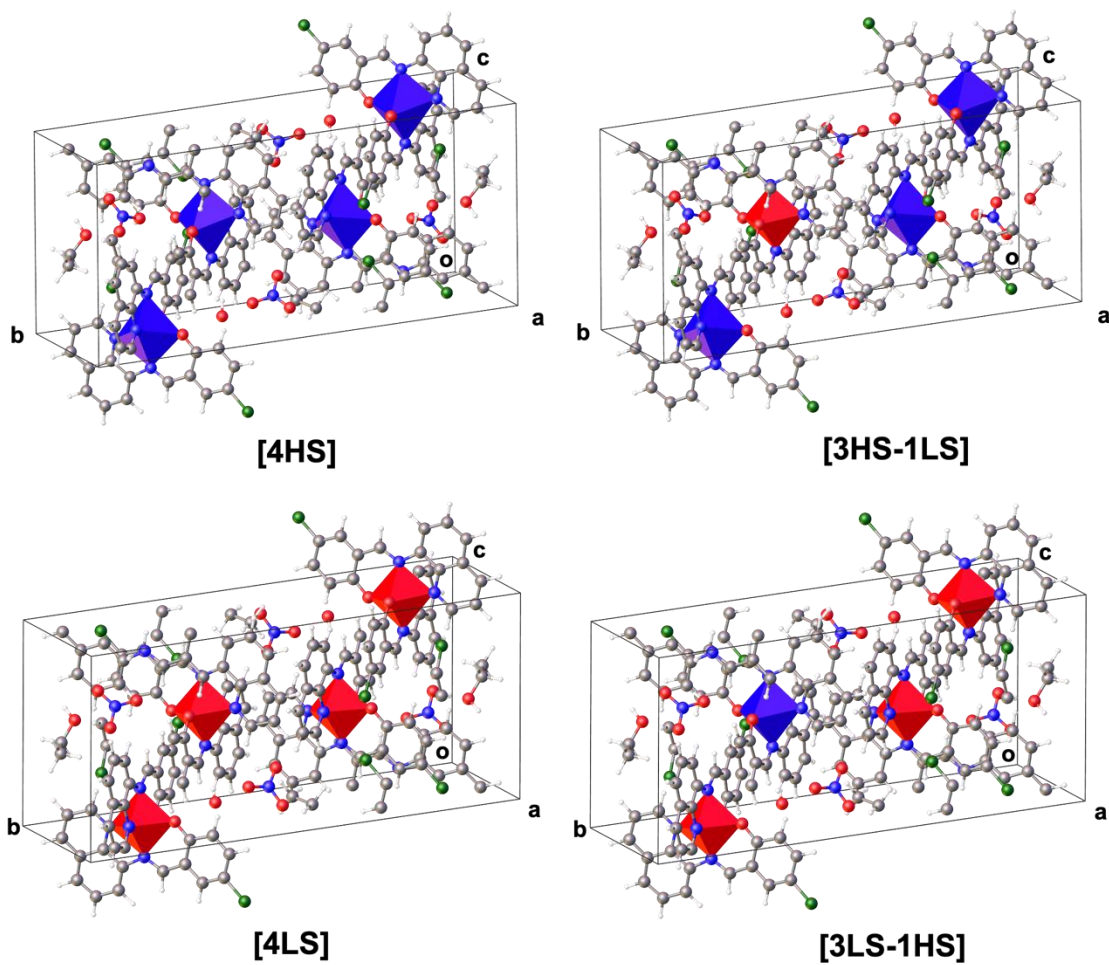

**Figure S17.** Unit cell of the optimized structures of **2** with [4HS] and [3HS-1LS] (top) [4LS] and [3LS-1HS] (bottom).

**2ps : [Fe(qsal-Cl)<sub>2</sub>]NO<sub>3</sub>·0.5EtOH**

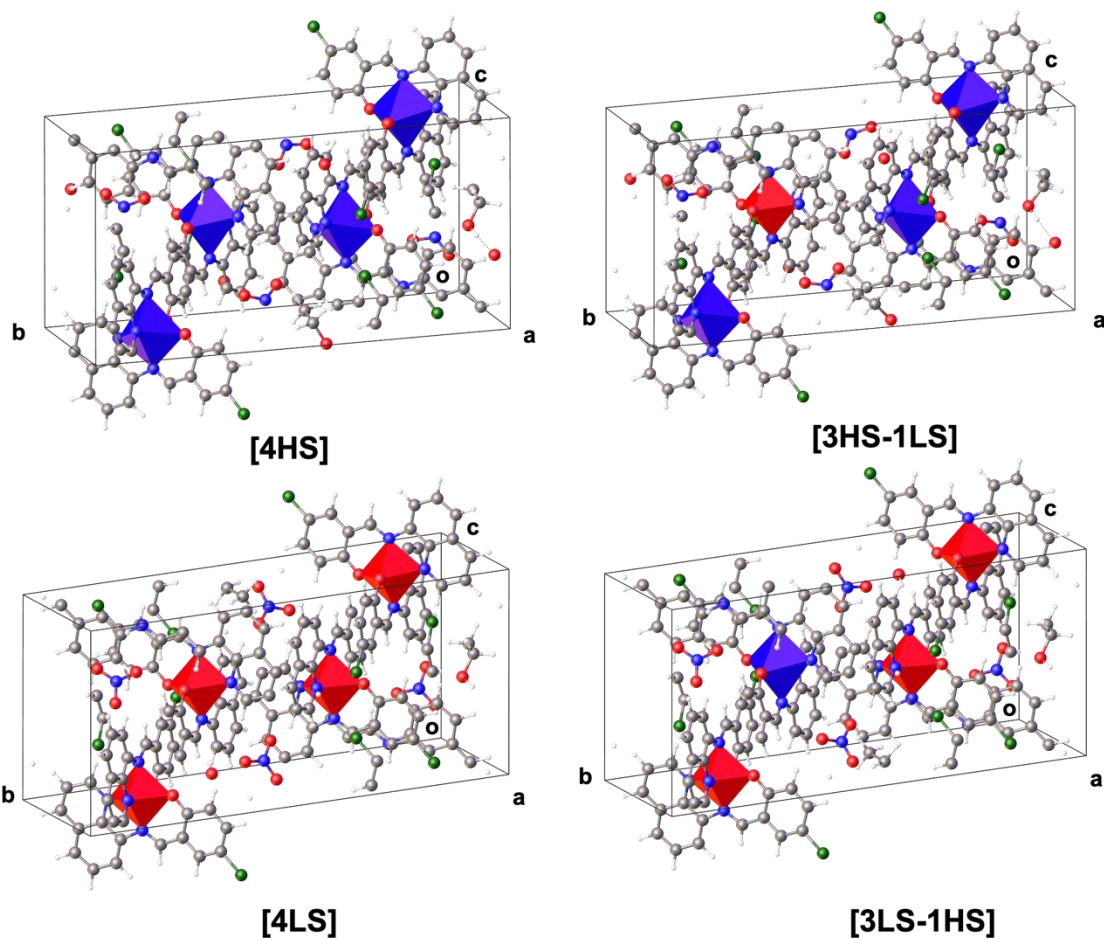

**Figure S18.** Unit cell of the optimized structures of **2ps** with [4HS] and [3HS-1LS] (top) [4LS] and [3LS-1HS] (bottom).

**2ns : [Fe(qsal-Cl)<sub>2</sub>]<sub>2</sub>NO<sub>3</sub>**

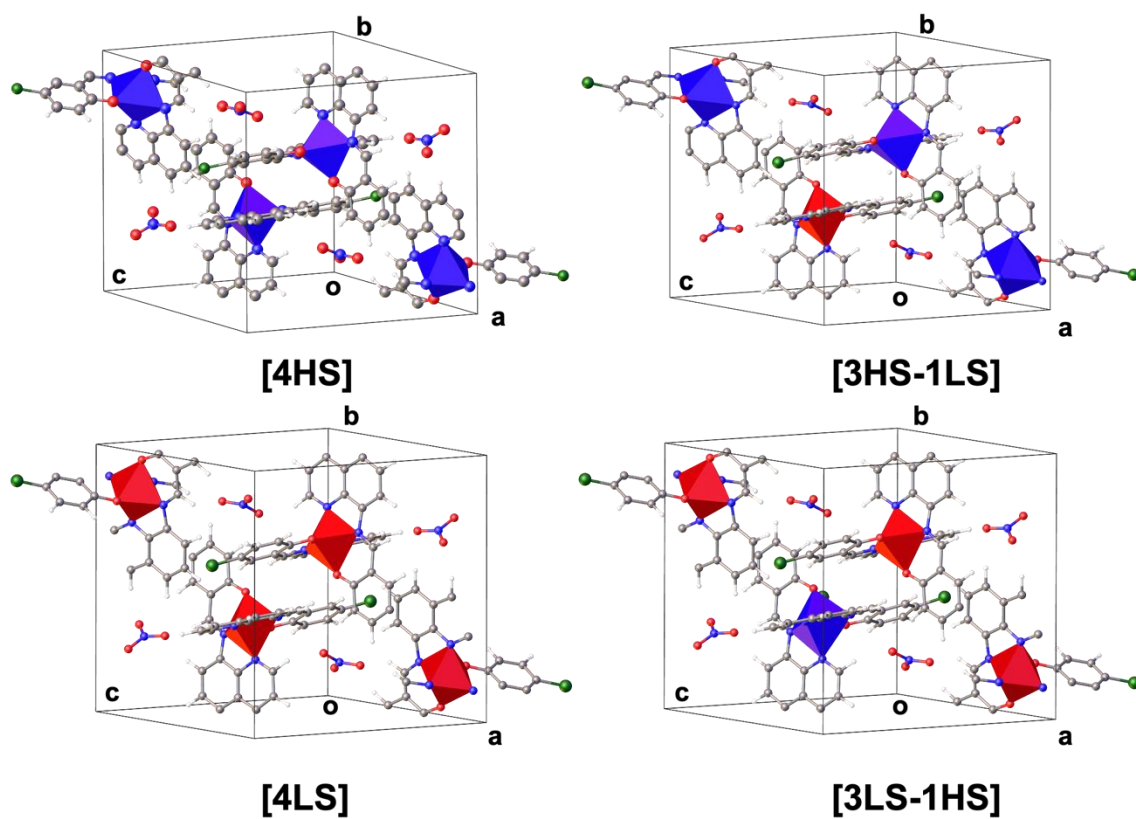

**Figure S19.** Unit cell of the optimized structures of **2ns** with [4HS] and [3HS-1LS] (top) [4LS] and [3LS-1HS] (bottom).
